# Supplementary material for: Design, synthesis, and biological evaluation of novel halogenated chlorido[N,N′-bis(salicylidene)-1,2-bis(3-methoxyphenyl)ethylenediamine]iron(III) complexes as anticancer agents
Source: PubMed Central journal article supplement (PMC11390779; doi:10.1007/s00775-024-02067-9), 2024-08-12
Supplement: 775_2024_2067_MOESM1_ESM.pdf [file 775_2024_2067_MOESM1_ESM.pdf]

## Supplementary Information

### Design, synthesis, and biological evaluation of novel halogenated chlorido[*N,N'*-bis(salicylidene)-1,2-bis(3-methoxyphenyl)ethylenediamine]iron(III) complexes as anticancer agents

Astrid Dagmar Bernkop-Schnürch<sup>1</sup>, Klaus Huber<sup>1</sup>, Armida Clauser<sup>1,2</sup>, Monika Cziferszky<sup>1</sup>, Daniel Leitner<sup>3</sup>, Heribert Talasz<sup>4</sup>, Martin Hermann<sup>5</sup>, Stephan Hohloch<sup>3</sup>, Ronald Gust<sup>1</sup>, Brigitte Kircher<sup>\*2,6</sup>

<sup>1</sup>Department of Pharmaceutical Chemistry, Institute of Pharmacy, CMBI—Center for Molecular Biosciences Innsbruck, CCB—Center for Chemistry and Biomedicine, University of Innsbruck, Innrain 80-82, 6020 Innsbruck, Austria

<sup>2</sup>Immunobiology and Stem Cell Laboratory, Department of Internal Medicine V (Hematology and Oncology), Medical University of Innsbruck, Anichstraße 35, 6020 Innsbruck, Austria

<sup>3</sup>Department of General, Inorganic and Theoretical Chemistry, University of Innsbruck, Innrain 80-82, 6020 Innsbruck, Austria

<sup>4</sup>Biocenter, Institute of Medical Biochemistry, Protein Core Facility, Medical University of Innsbruck, Innrain 80-82, 6020 Innsbruck, Austria

<sup>5</sup>Department of Anesthesiology and Critical Care Medicine, Medical University of Innsbruck, Anichstraße 35, 6020 Innsbruck, Austria

<sup>6</sup>Tyrolean Cancer Research Institute, Innrain 66, 6020 Innsbruck, Austria

#### \*Correspondence

brigitte.kircher@i-med.ac.at

## Table of Content

|                                                                                                            |     |
|------------------------------------------------------------------------------------------------------------|-----|
| <b>1. Characterisation of the ligands L1 – L3</b> .....                                                    | S3  |
| 1.1. <sup>1</sup> H NMR spectra of the ligands .....                                                       | S3  |
| 1.2. <sup>13</sup> C NMR spectra of the ligands .....                                                      | S6  |
| 1.3. <sup>1</sup> H – <sup>13</sup> C heteronuclear single quantum correlation (HSQC) of the ligands ..... | S9  |
| 1.4. FT-IR spectra of the ligands .....                                                                    | S10 |
| 1.5. HPLC chromatograms of the ligands .....                                                               | S12 |
| <b>2. Characterisation of the complexes X1 – X3</b> .....                                                  | S14 |
| 2.1. FT-IR spectra of the complexes .....                                                                  | S14 |
| 2.2. HPLC chromatograms of the complexes .....                                                             | S16 |
| 2.3. NMR spectra with Evans method of the complexes .....                                                  | S18 |
| 2.4. EPR spectra of the complexes .....                                                                    | S21 |
| <b>3. Reactivity toward biological nucleophiles</b> .....                                                  | S22 |
| <b>4. Biological activity</b> .....                                                                        | S24 |

## 1. Characterisation of the ligands L1 – L3

### 1.1. $^1\text{H}$ NMR spectra of the ligands

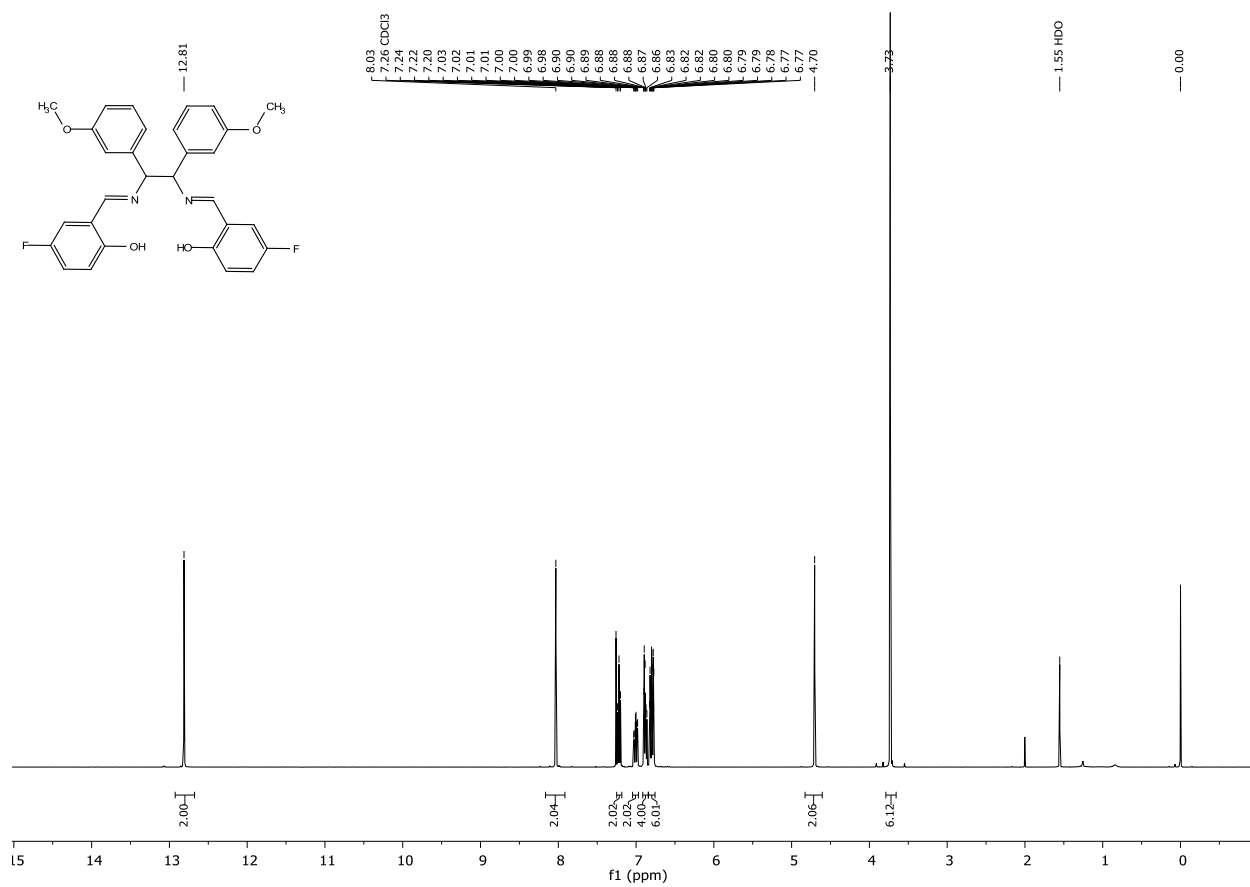

**Figure S1:**  $^1\text{H}$  NMR of L1 in  $\text{CDCl}_3$

$^1\text{H}$  NMR (400 MHz,  $\text{CDCl}_3$ -*d*)  $\delta$  12.81 (s, 2H), 8.03 (s, 2H), 7.22 (t,  $J = 7.9$  Hz, 2H), 7.01 (ddd,  $J = 9.1, 8.1, 3.1$  Hz, 2H), 6.92 – 6.84 (m, 4H), 6.84 – 6.75 (m, 6H), 4.70 (s, 2H), 3.73 (s, 6H)

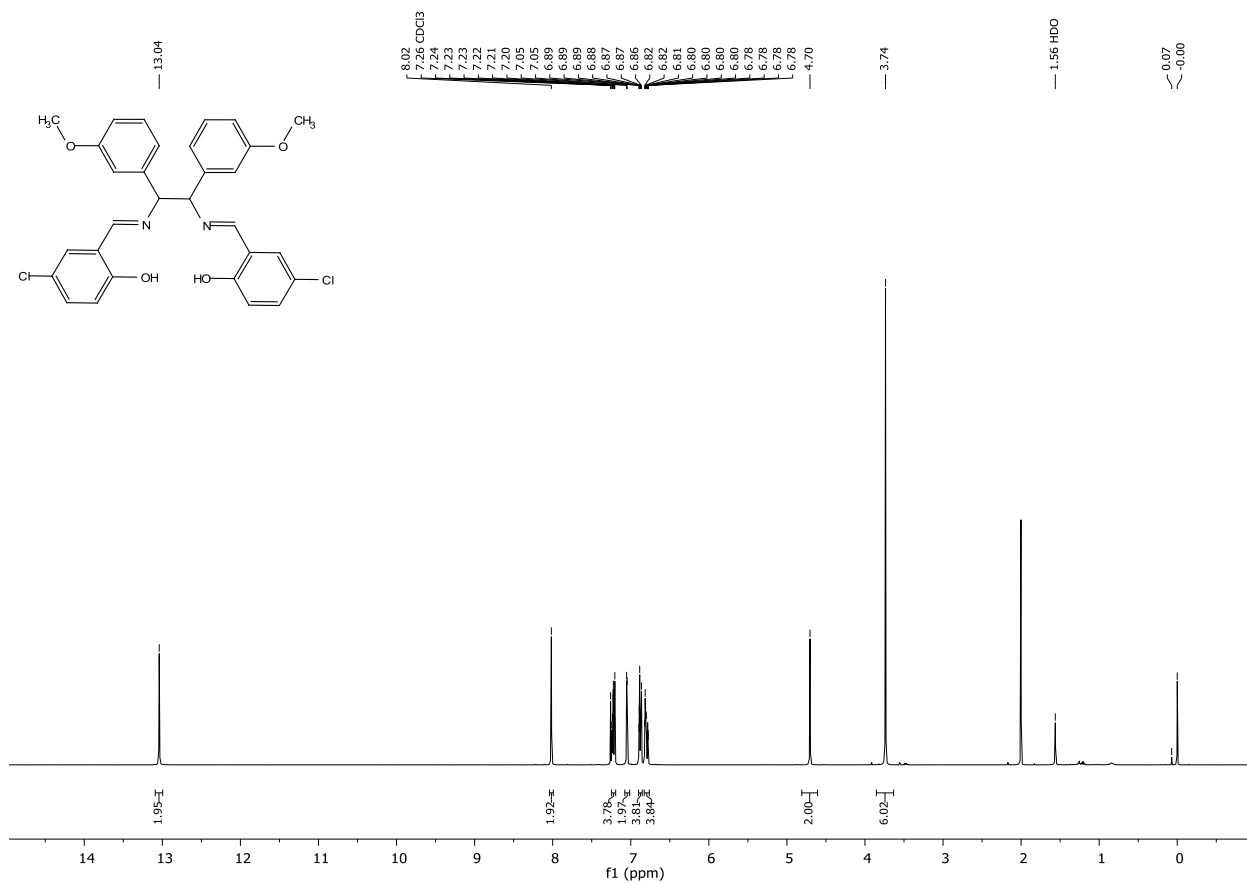

**Figure S2:** <sup>1</sup>H NMR of **L2** in CDCl<sub>3</sub>

<sup>1</sup>H NMR (400 MHz, CDCl<sub>3</sub>-d) δ 13.04 (s, 2H), 8.02 (s, 2H), 7.27 – 7.18 (m, 4H), 7.05 (d, *J* = 2.5 Hz, 2H), 6.92 – 6.84 (m, 4H), 6.84 – 6.75 (m, 4H), 4.70 (s, 2H), 3.74 (s, 6H)

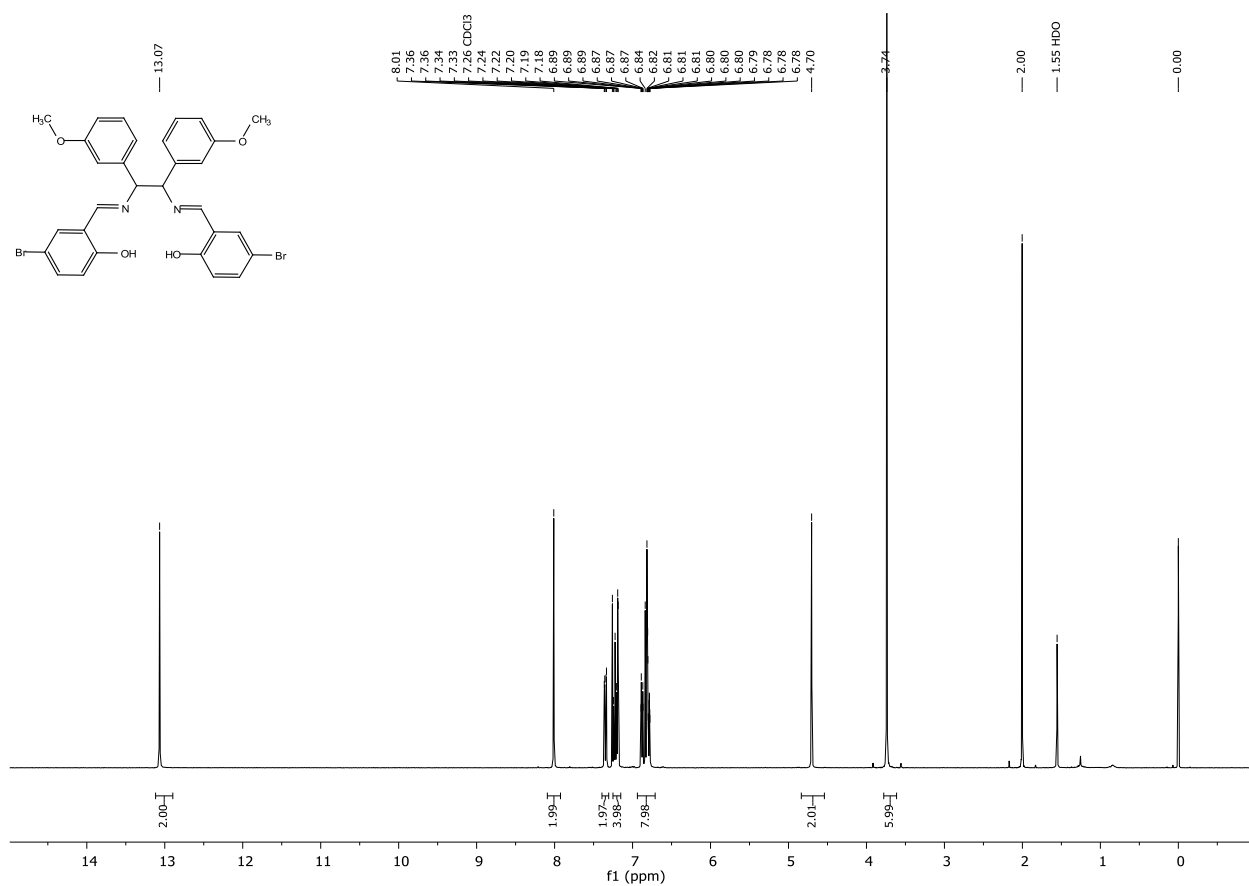

**Figure S3:**  $^1\text{H}$  NMR of **L3** in  $\text{CDCl}_3$

$^1\text{H}$  NMR (400 MHz,  $\text{CDCl}_3$ -*d*)  $\delta$  13.07 (s, 2H), 8.01 (s, 2H), 7.35 (dd,  $J = 8.8, 2.5$  Hz, 2H), 7.27 – 7.16 (m, 4H), 6.91 – 6.75 (m, 8H), 4.70 (s, 2H), 3.74 (s, 6H)

## 1.2. $^{13}\text{C}$ NMR spectra of the ligands

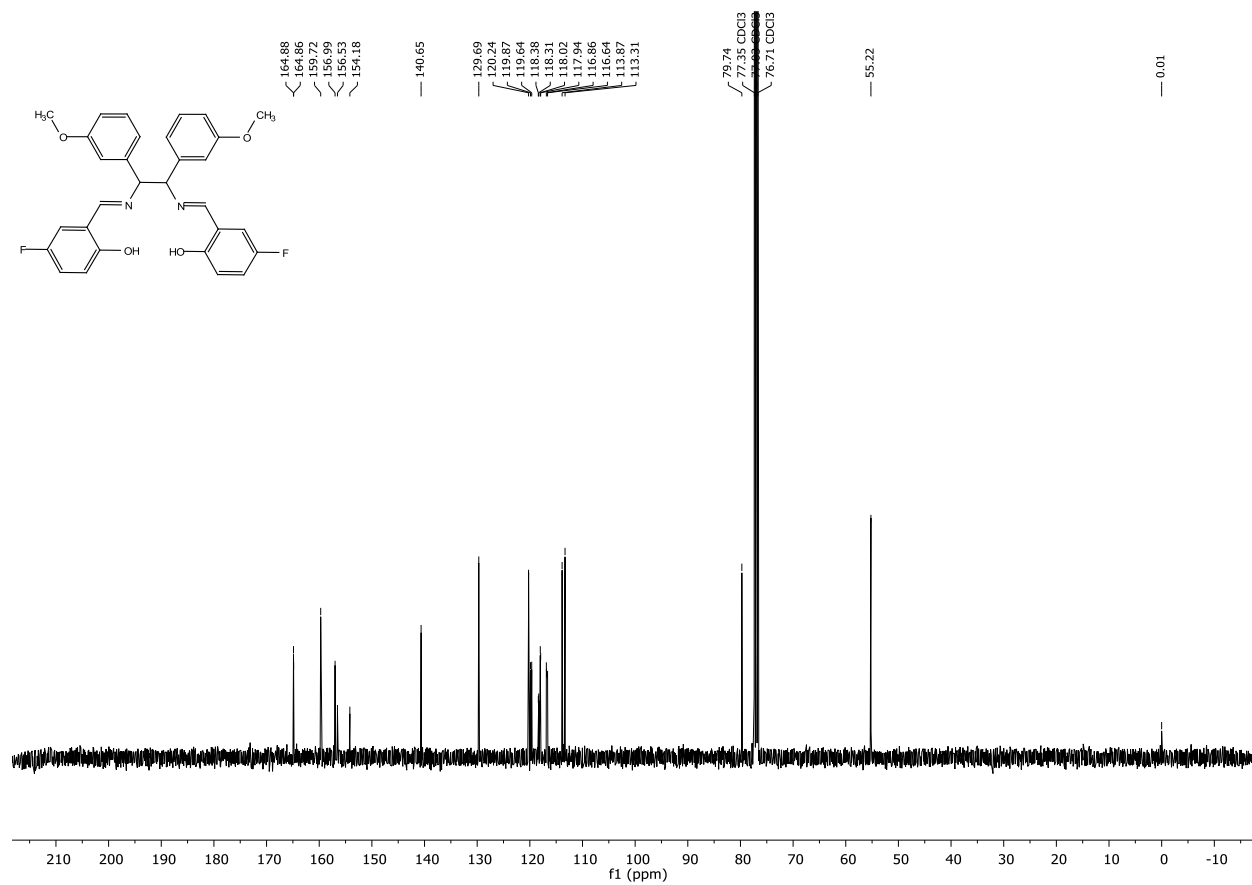

**Figure S4:**  $^{13}\text{C}$  NMR of **L1** in  $\text{CDCl}_3$

$^{13}\text{C}$  NMR (101 MHz,  $\text{CDCl}_3$ -*d*)  $\delta$  164.87 (d,  $J = 2.7$  Hz), 161.75 – 152.15 (m), 140.65, 129.69, 120.24, 119.76 (d,  $J = 23.2$  Hz), 118.16 (dd,  $J = 37.0, 7.3$  Hz), 116.75 (d,  $J = 22.8$  Hz), 113.87, 113.31, 79.74, 55.22

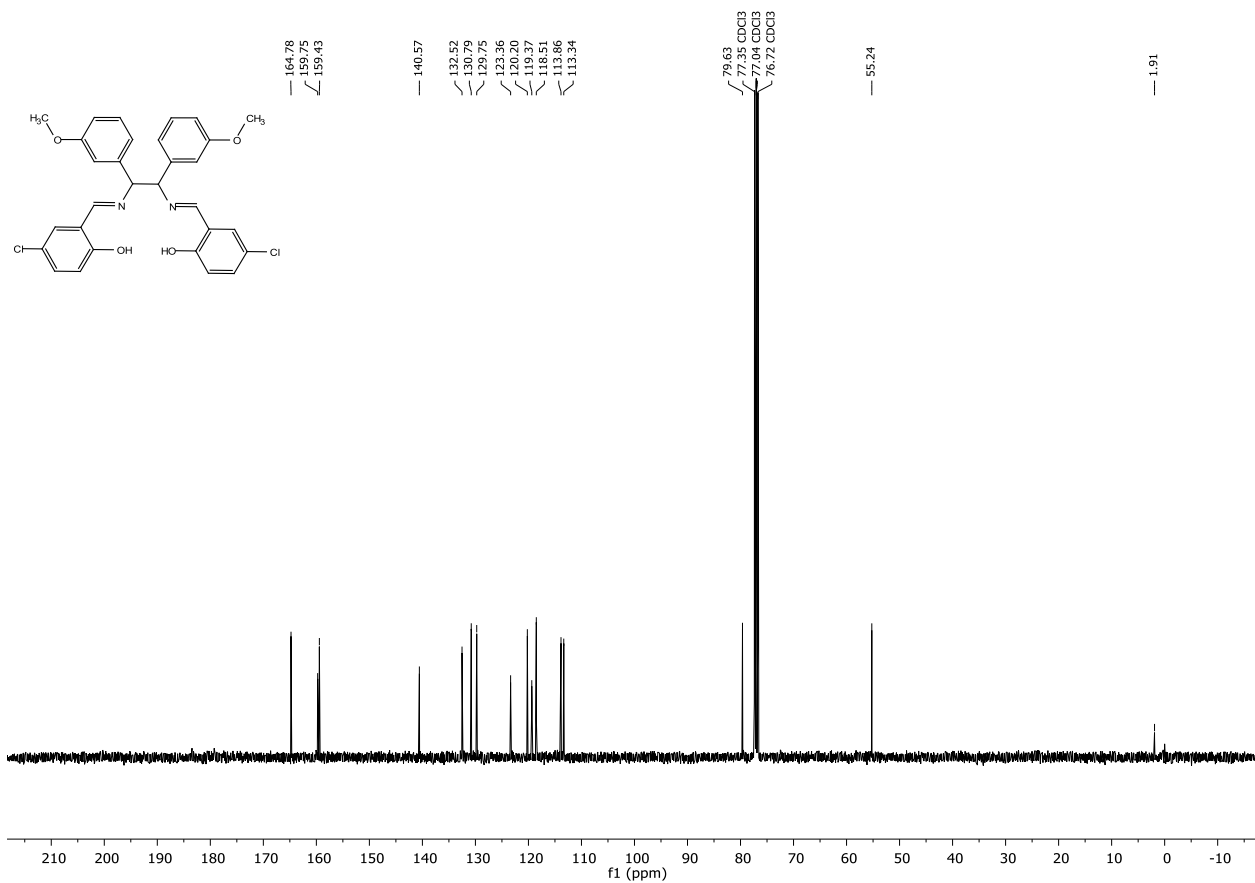

**Figure S5:** <sup>13</sup>C NMR of L2 in CDCl<sub>3</sub>

<sup>13</sup>C NMR (101 MHz, CDCl<sub>3</sub>-d) δ 164.78, 159.75, 159.43, 140.57, 132.52, 130.79, 129.75, 123.36, 120.20, 119.37, 118.51, 113.86, 113.34, 79.63, 55.24

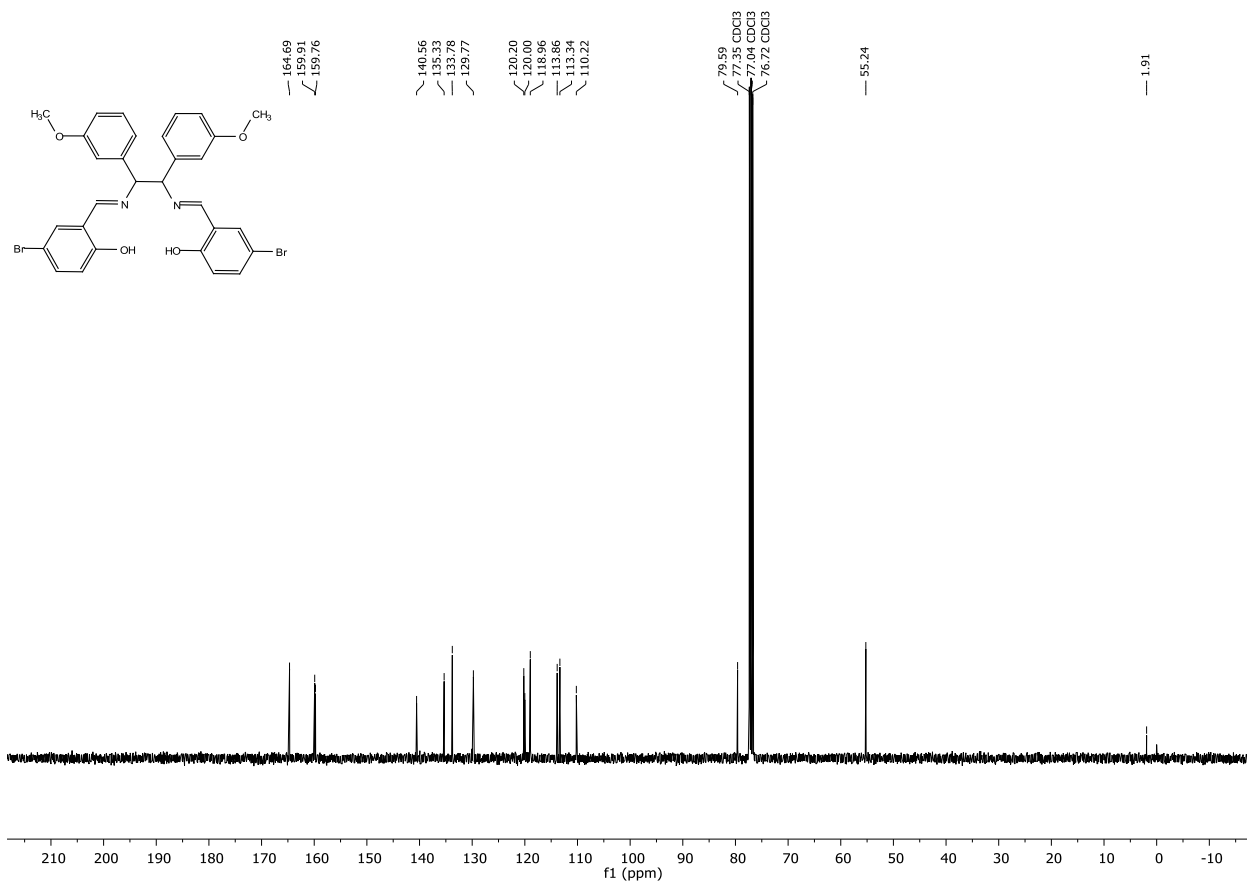

**Figure S6:** <sup>13</sup>C NMR of L3 in CDCl<sub>3</sub>

<sup>13</sup>C NMR (101 MHz, CDCl<sub>3</sub>-d) δ 164.69, 159.91, 159.76, 140.56, 135.33, 133.78, 129.77, 120.20, 120.00, 118.96, 113.86, 113.34, 110.22, 79.59, 55.24



### 1.3. $^1\text{H} - ^{13}\text{C}$ heteronuclear single quantum correlation (HSQC) of the ligands

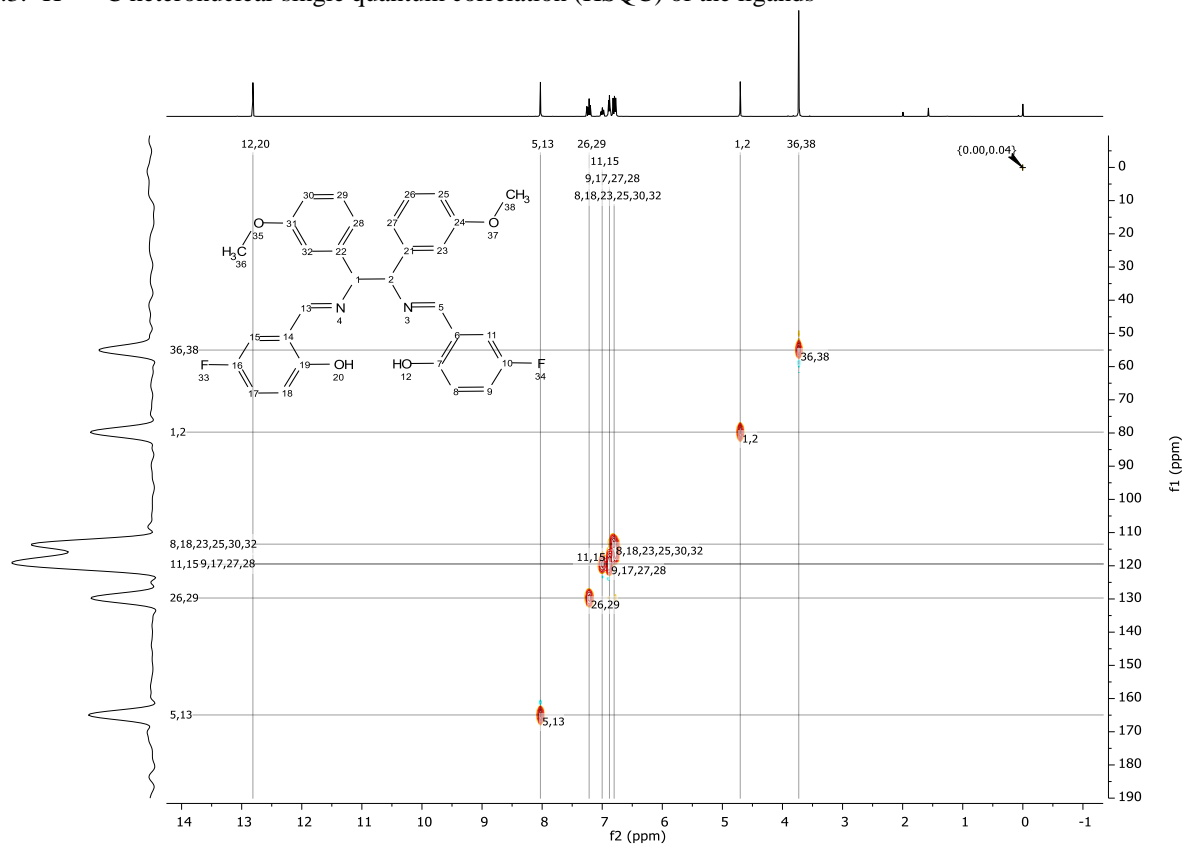

**Figure S7:**  $^1\text{H} - ^{13}\text{C}$  HSQC spectrum of L1 in  $\text{CDCl}_3$

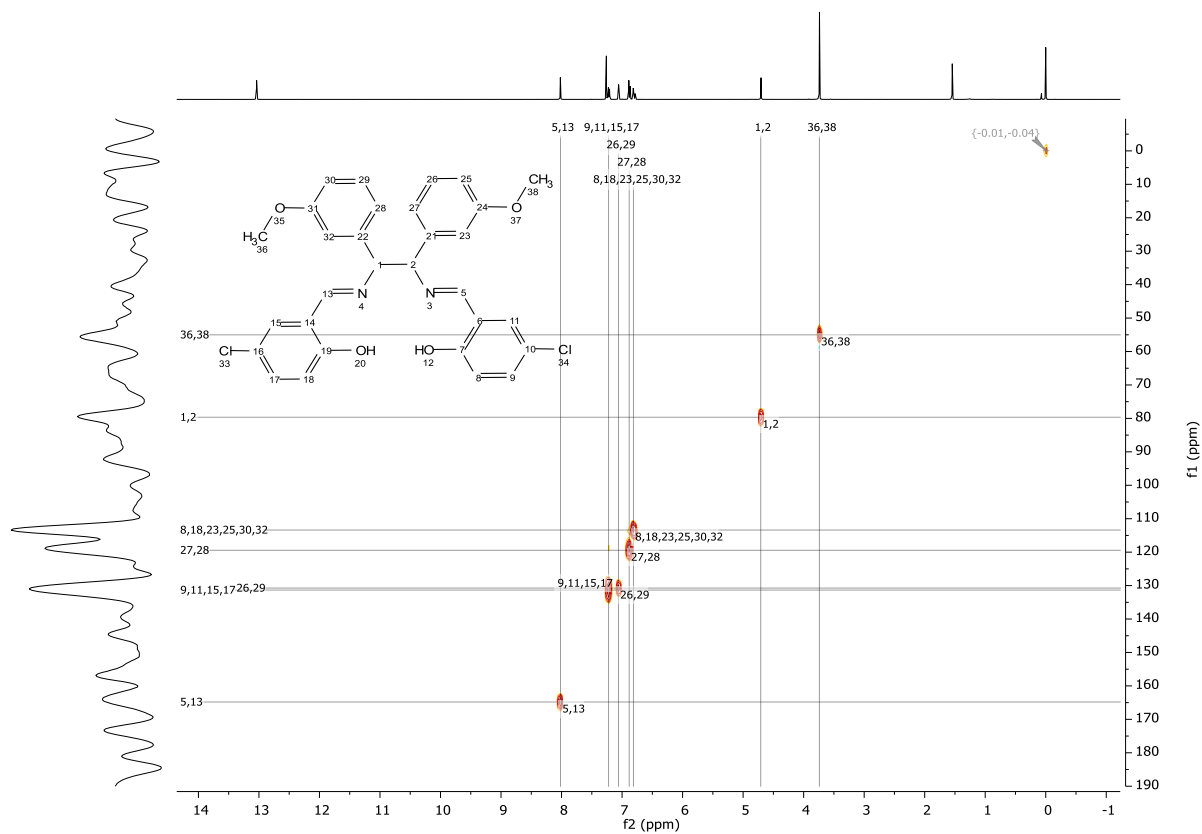

**Figure S8:**  $^1\text{H} - ^{13}\text{C}$  HSQC spectrum of L2 in  $\text{CDCl}_3$

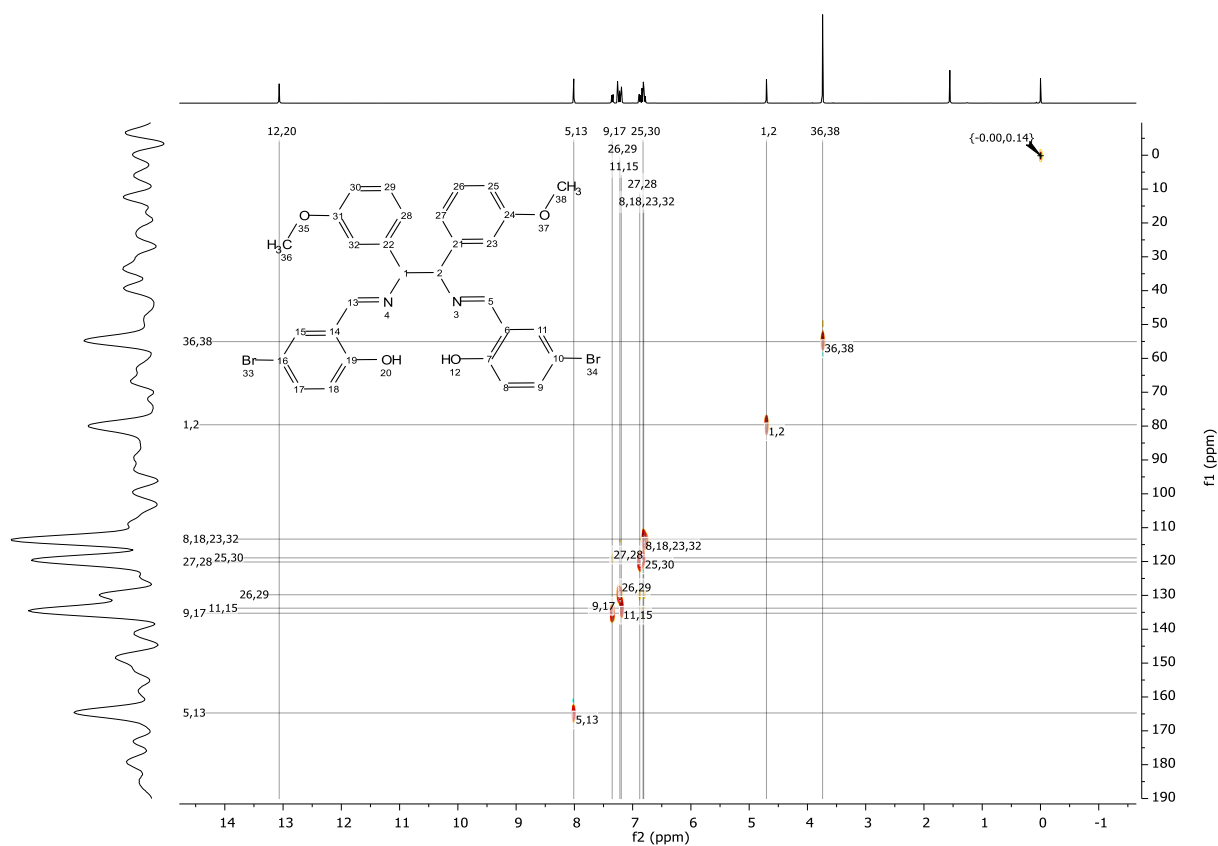

**Figure S9:**  $^1\text{H}$  –  $^{13}\text{C}$  HSQC spectrum of L3 in  $\text{CDCl}_3$

#### 1.4. FT-IR spectra of the ligands

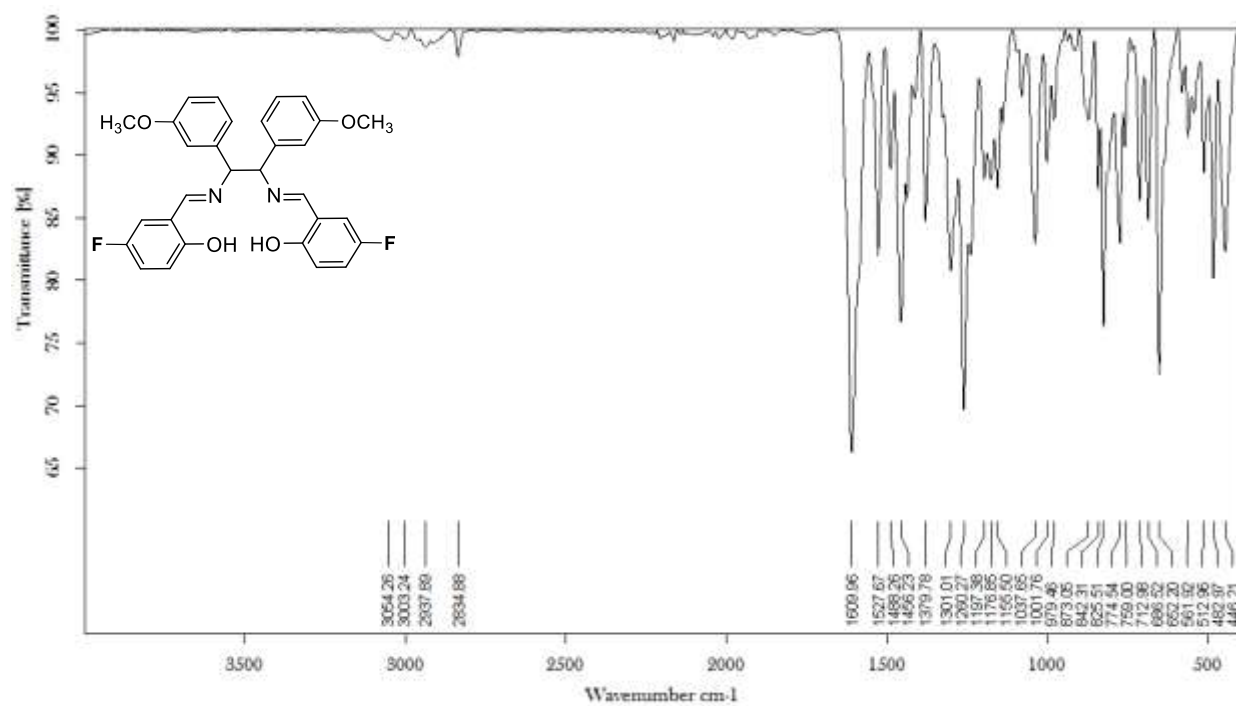

**Figure S10:** FT-IR spectrum of the neat L1

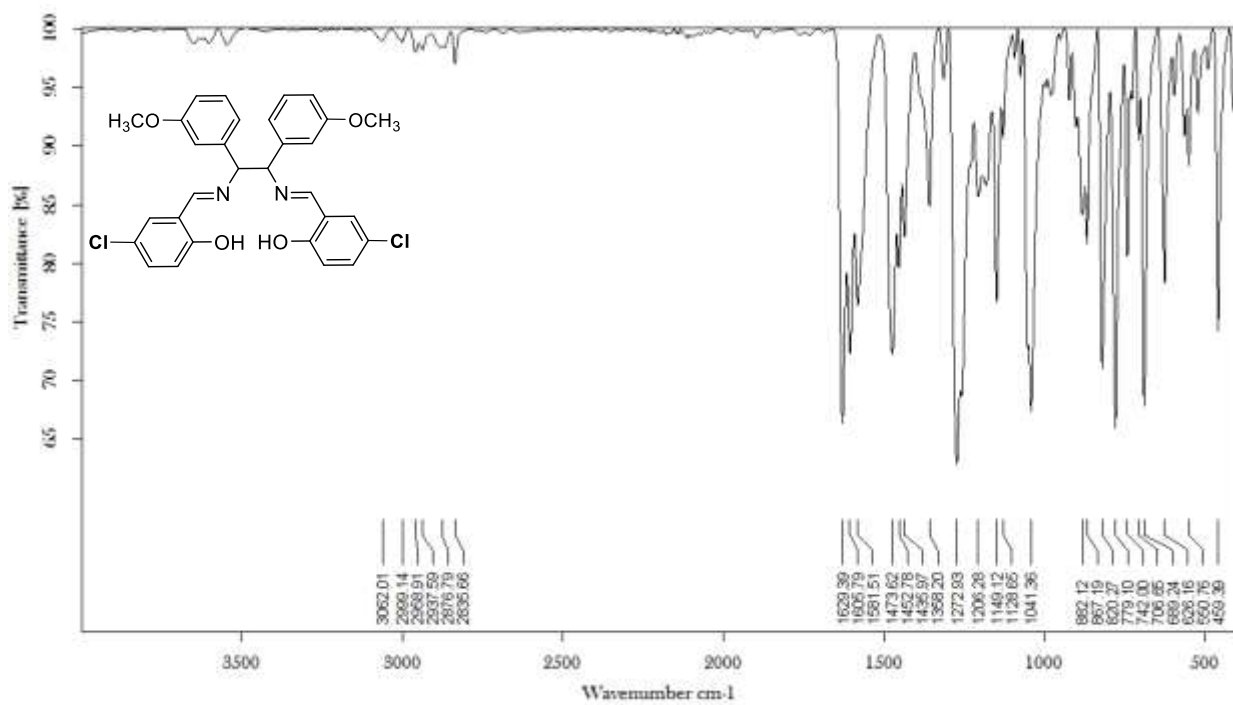

Figure S11: FT-IR spectrum of the neat L2

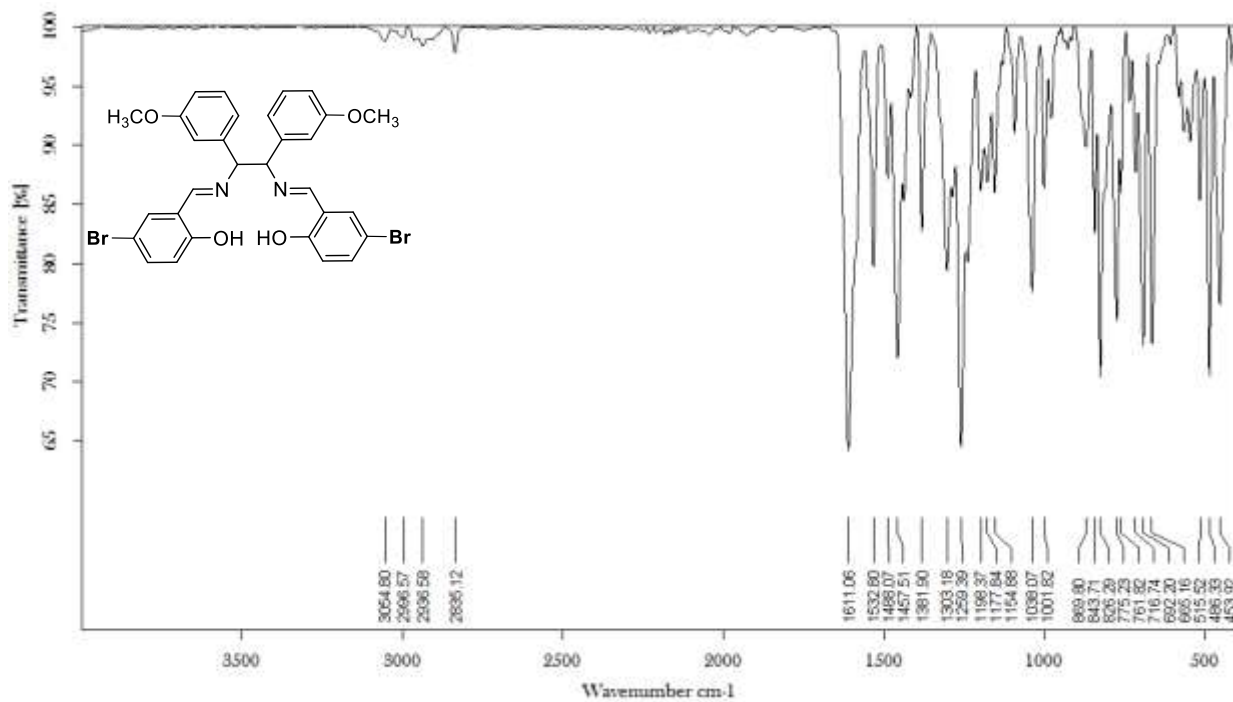

Figure S12: FT-IR spectrum of the neat L3

## 1.5. HPLC chromatograms of the ligands

**Table S1: HPLC data L1 – L3**

| Nr. | Ret. Time in Min. | Area % |
|-----|-------------------|--------|
| L1  | 2.865             | 96.378 |
| L2  | 4.713             | 95.724 |
| L3  | 5.536             | 95.852 |

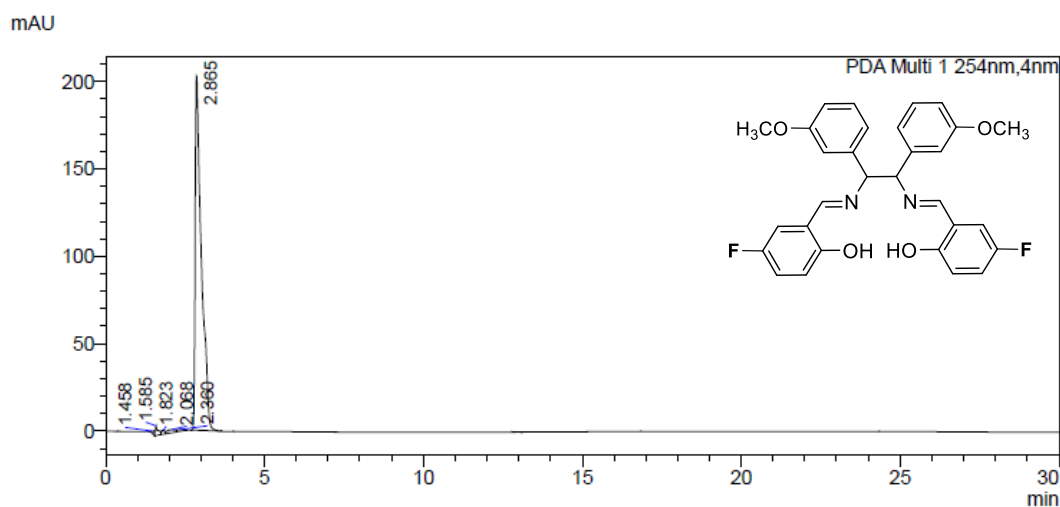

**Figure S13: HPLC chromatogram of L1**

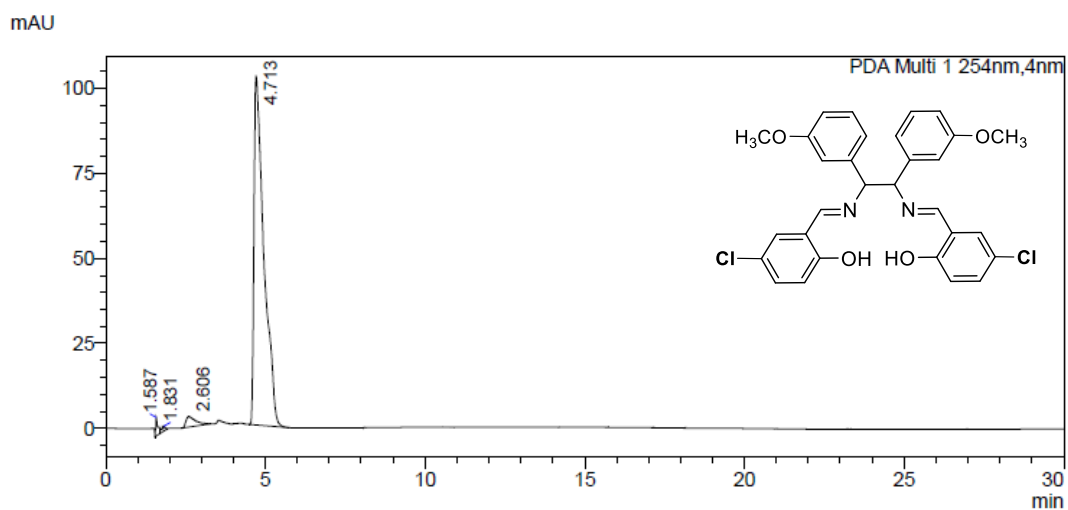

**Figure S14: HPLC chromatogram of L2**

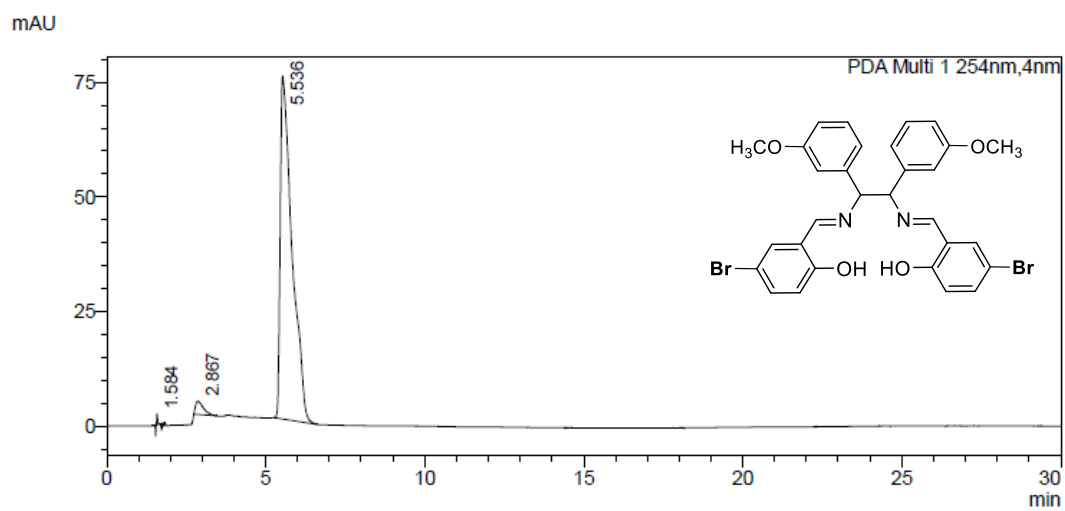

**Figure S15:** HPLC chromatogram of L3

## 2. Characterisation of the complexes X1 – X3

### 2.1. FT-IR spectra of the complexes

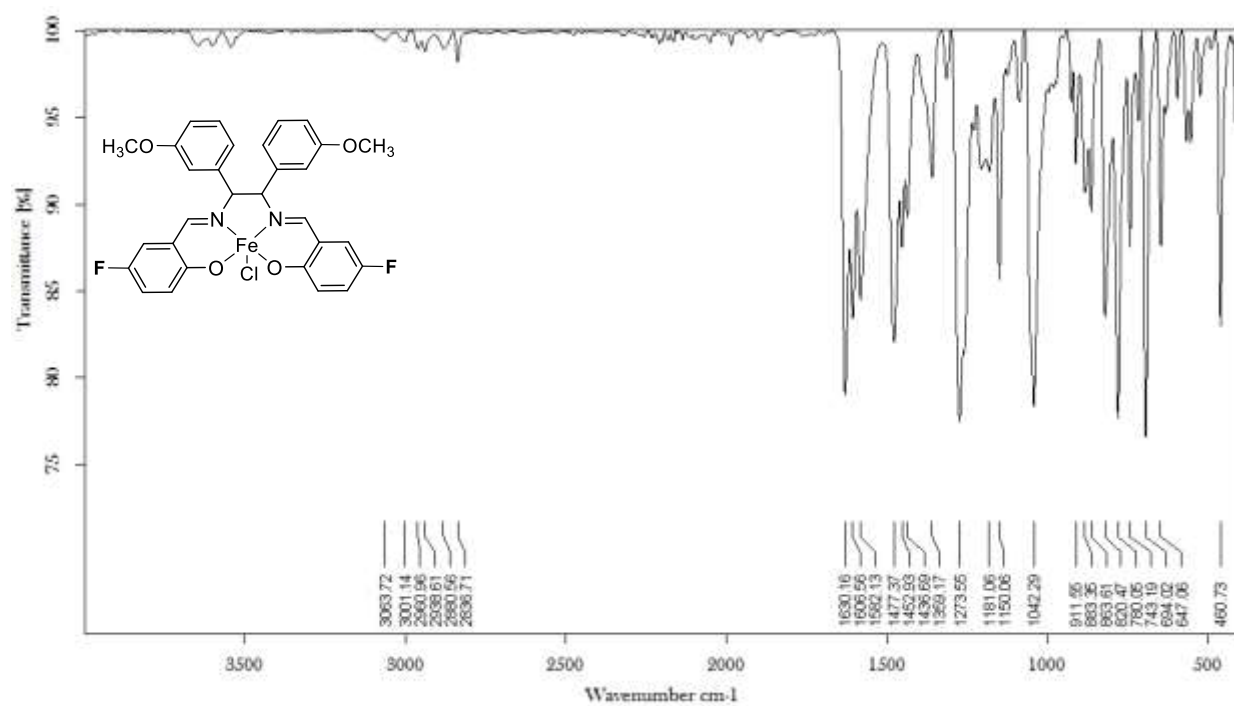

Figure S16: FT-IR spectrum of the neat X1

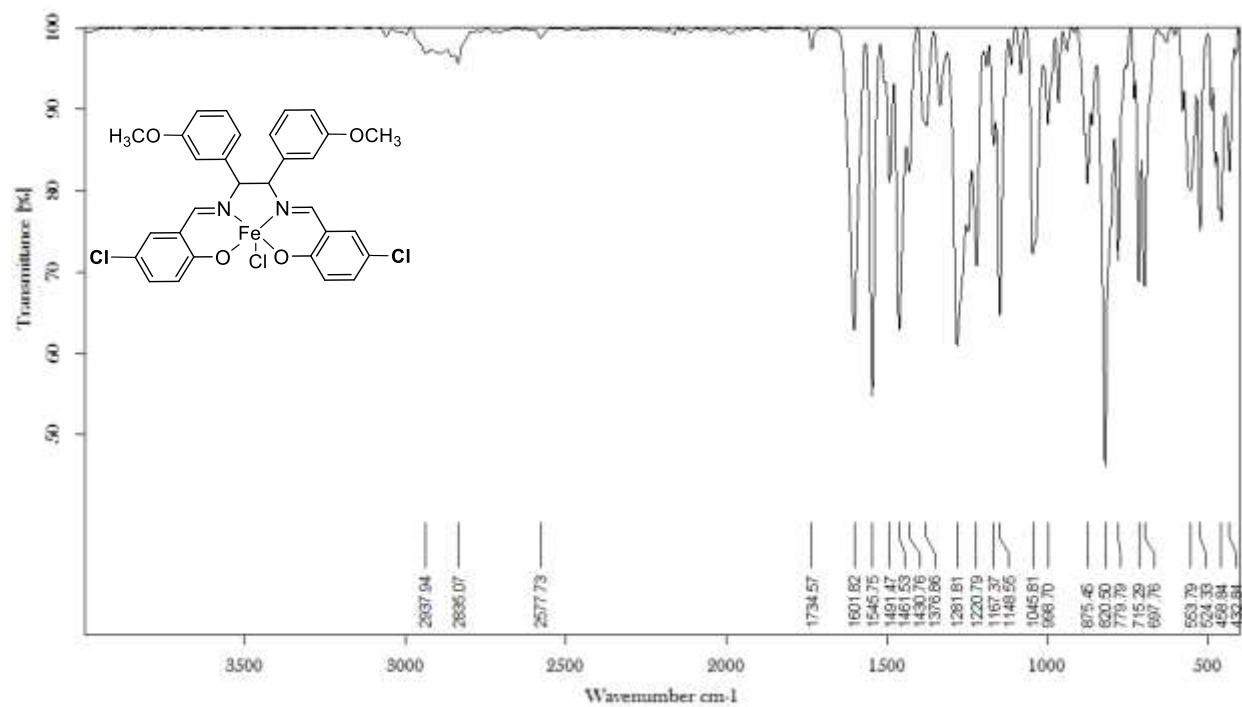

Figure S17: FT-IR spectrum of the neat X2

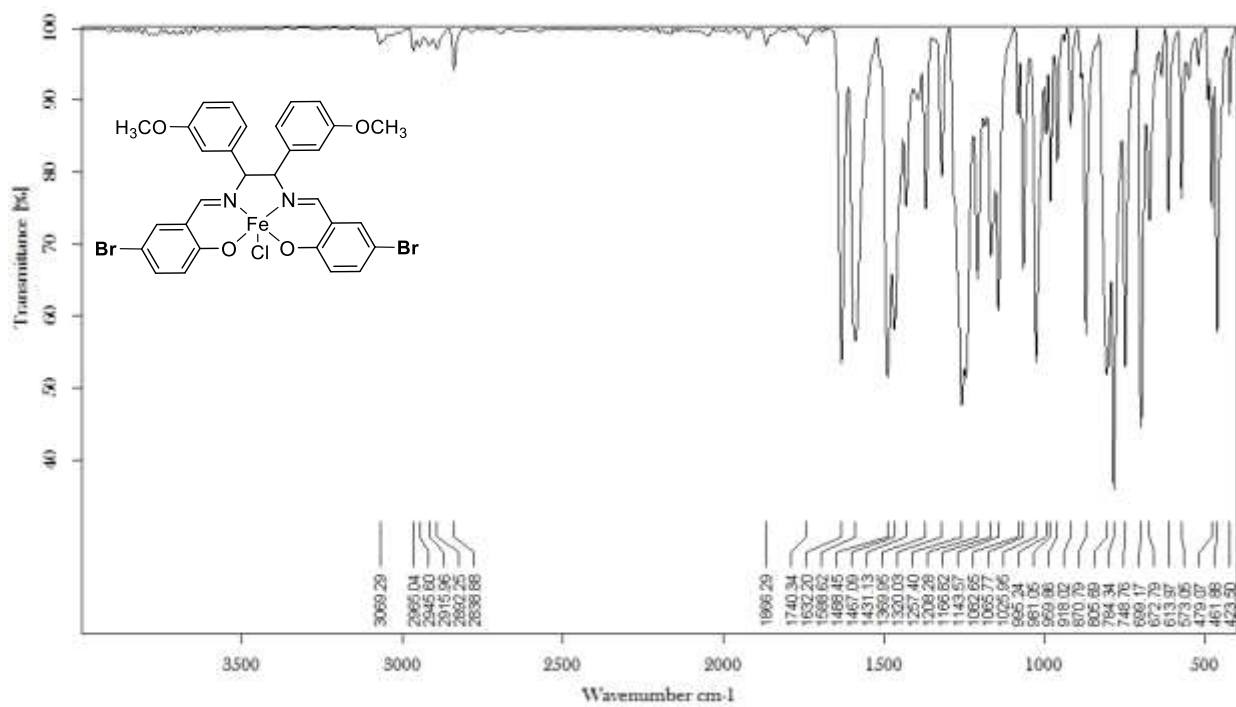

Figure S18: FT-IR spectrum of the neat X3

## 2.2. HPLC chromatograms of the complexes

**Table S2: HPLC data X1 – X3**

| Nr.       | Ret. Time in Min. | Area % |
|-----------|-------------------|--------|
| <b>X1</b> | 4.291             | 99.933 |
| <b>X2</b> | 7.614             | 99.794 |
| <b>X3</b> | 9.634             | 99.425 |

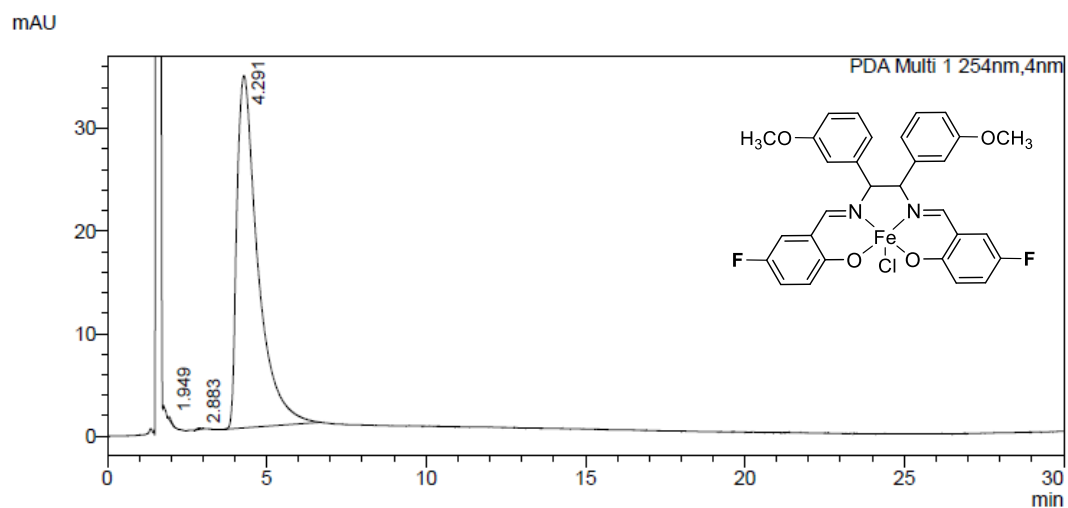

**Figure S19: HPLC chromatogram of X1**

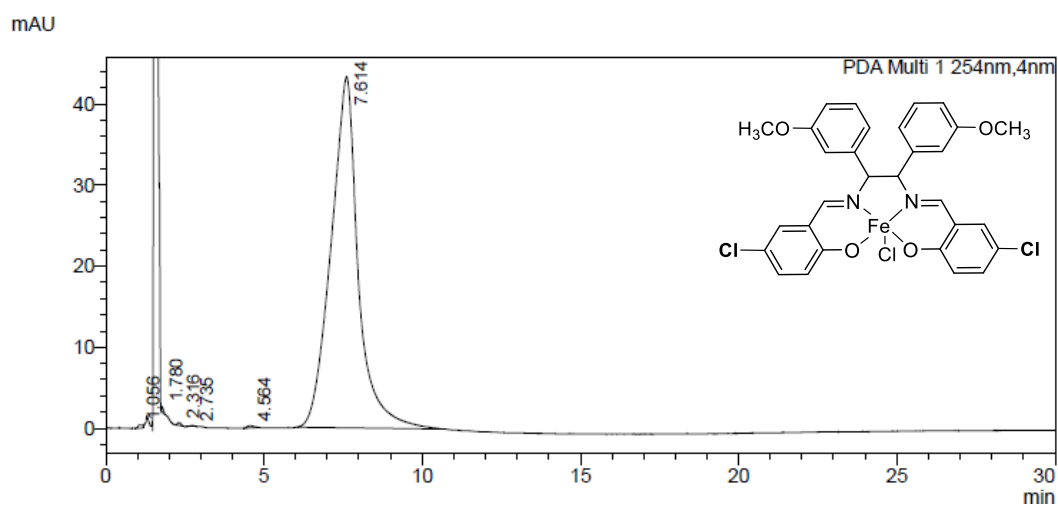

**Figure S20: HPLC chromatogram of X2**



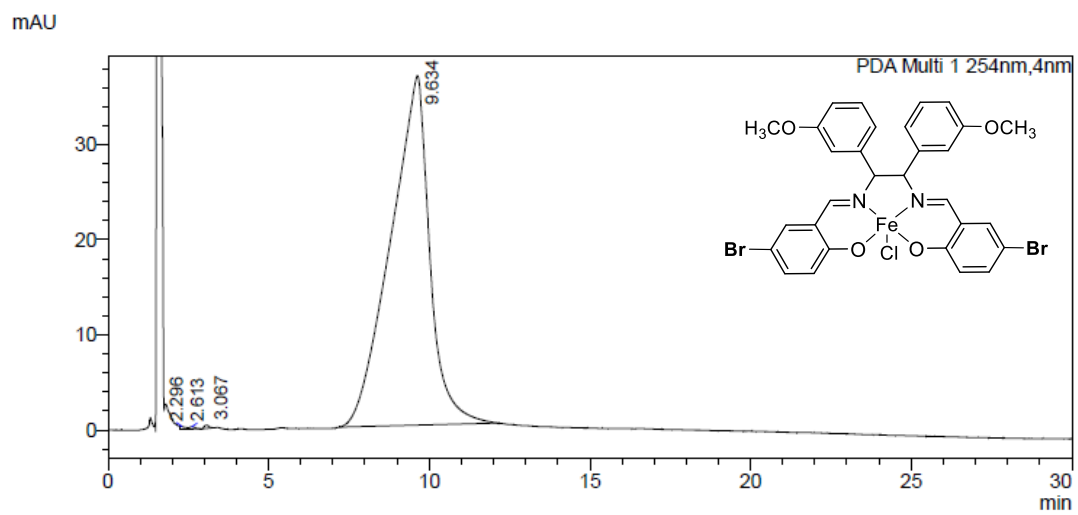

**Figure S21:** HPLC chromatogram of **X3**

### 2.3. NMR spectra with Evans method of the complexes

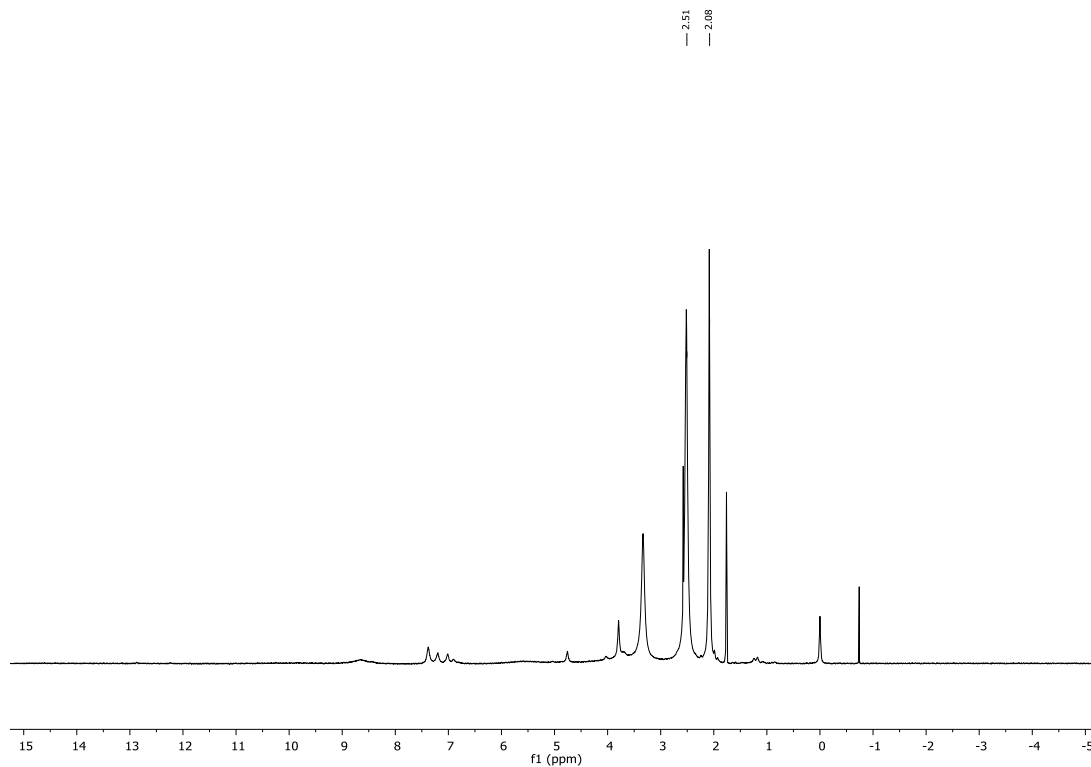

**Figure S22:** <sup>1</sup>H NMR spectrum of 5 mg of paramagnetic **X1** in DMSO-*d*<sub>6</sub> at 298 K with a DMSO-*d*<sub>6</sub> capillary. The shifted and unshifted solvent peaks are highlighted.

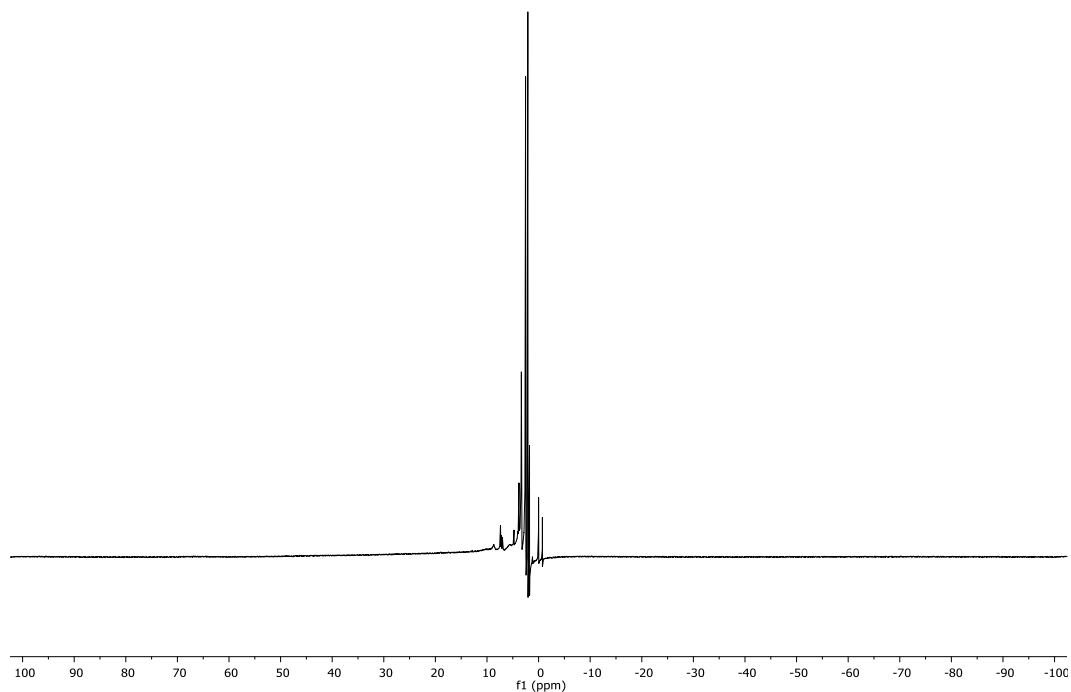

**Figure S23:** <sup>1</sup>H NMR spectrum of 5 mg of paramagnetic **X1** in DMSO-*d*<sub>6</sub> at 298 K

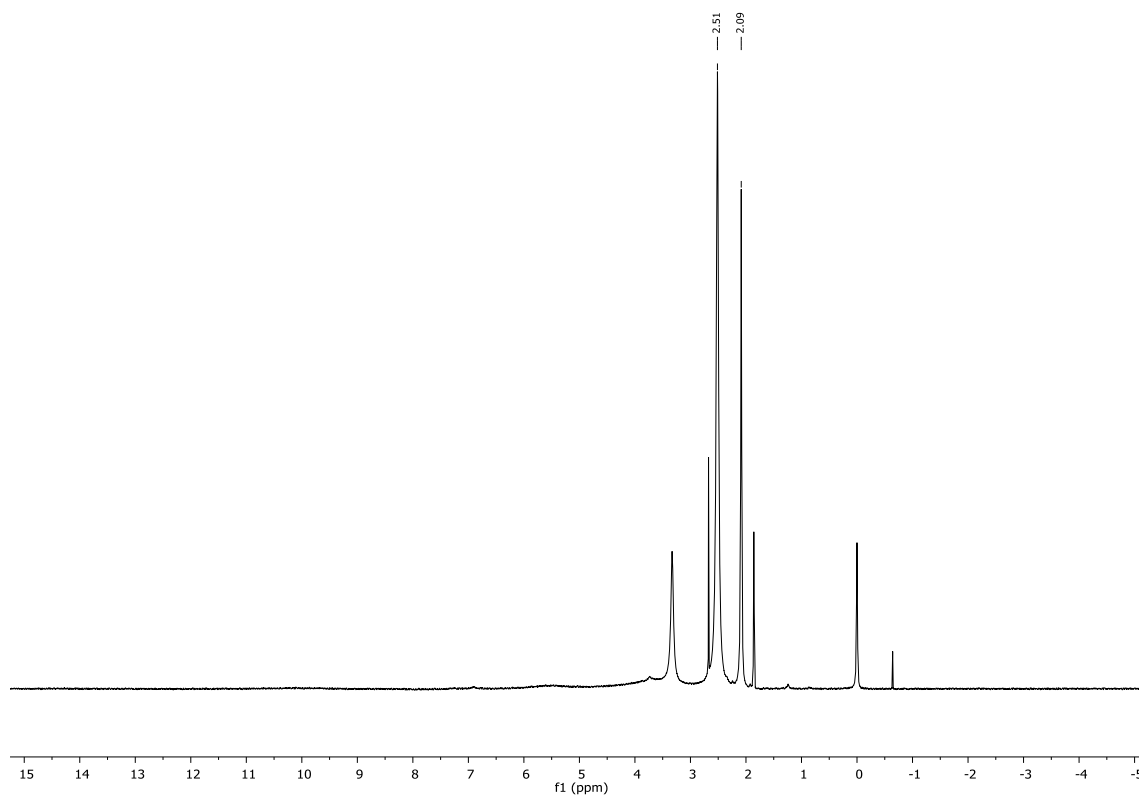

**Figure S24:**  $^1\text{H}$  NMR spectrum of 5 mg of paramagnetic **X2** in  $\text{DMSO-}d_6$  at 298 K with a  $\text{DMSO-}d_6$  capillary. The shifted and unshifted solvent peaks are highlighted.

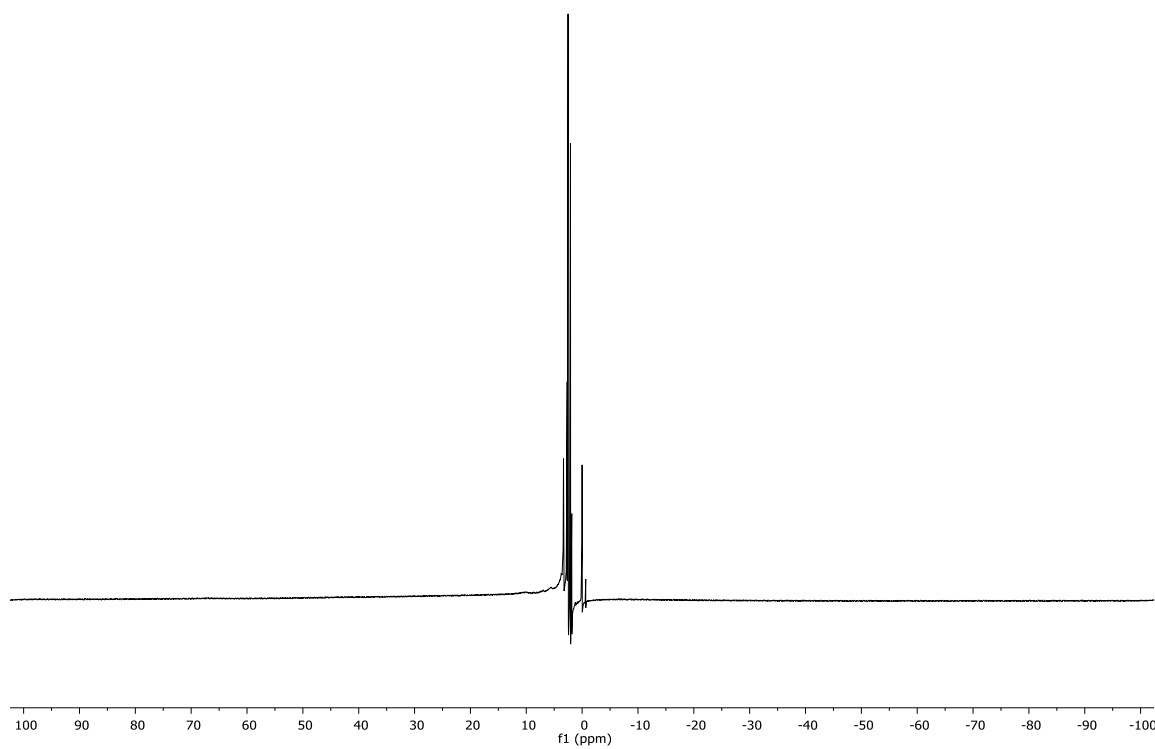

**Figure S25:**  $^1\text{H}$  NMR spectrum of 5 mg of paramagnetic **X2** in  $\text{DMSO-}d_6$  at 298 K

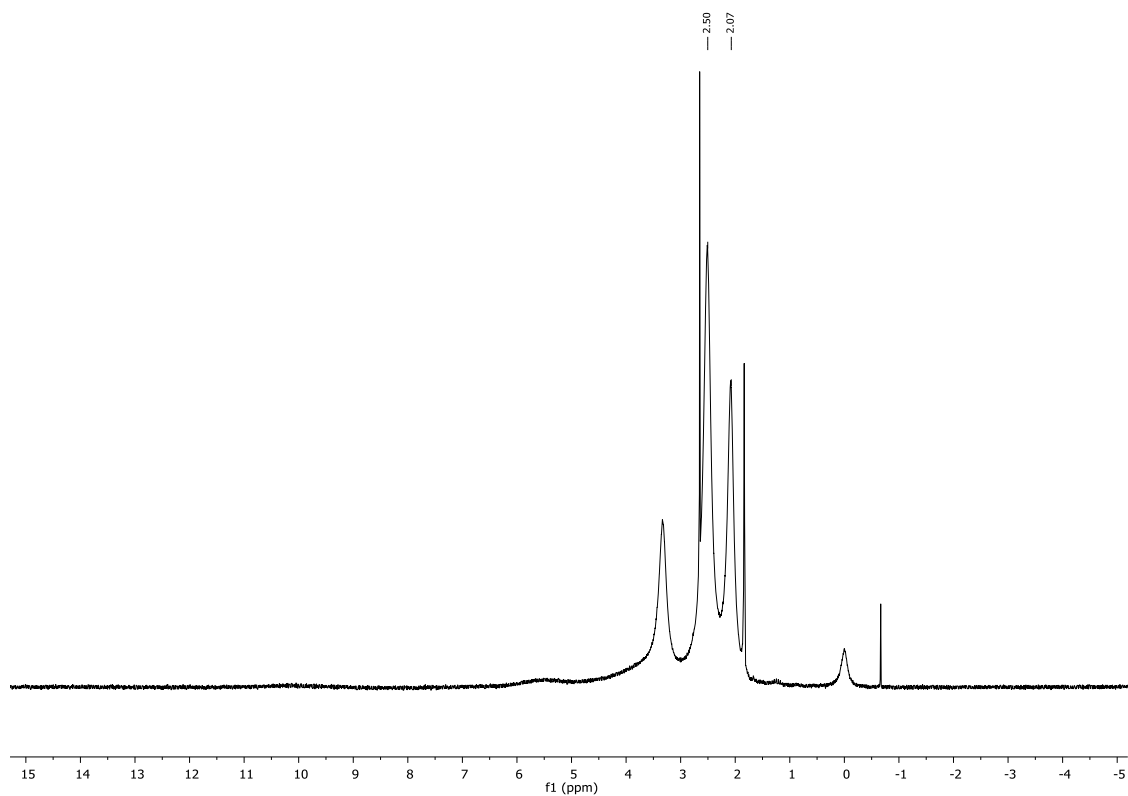

**Figure S26:**  $^1\text{H}$  NMR spectrum of 5 mg of paramagnetic **X3** in  $\text{DMSO-}d_6$  at 298 K with a  $\text{DMSO-}d_6$  capillary. The shifted and unshifted solvent peaks are highlighted.

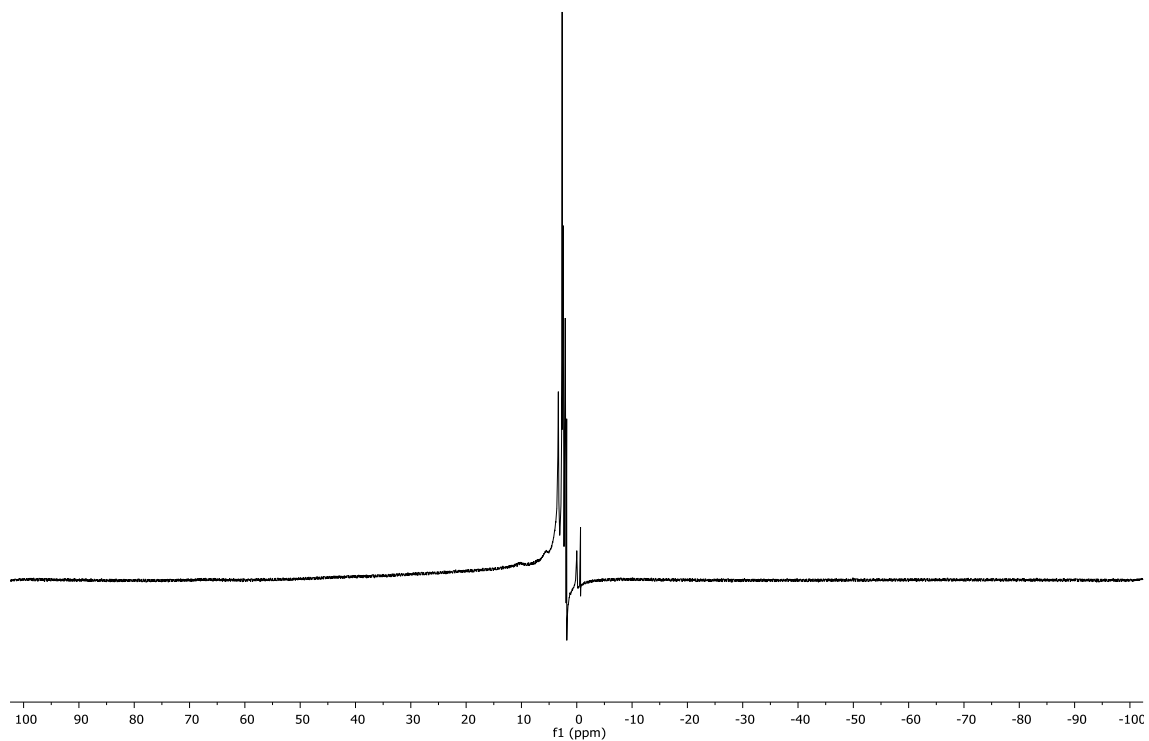

**Figure S27:**  $^1\text{H}$  NMR spectrum of 5 mg of paramagnetic **X3** in  $\text{DMSO-}d_6$  at 298 K

## 2.4. EPR spectra of the complexes

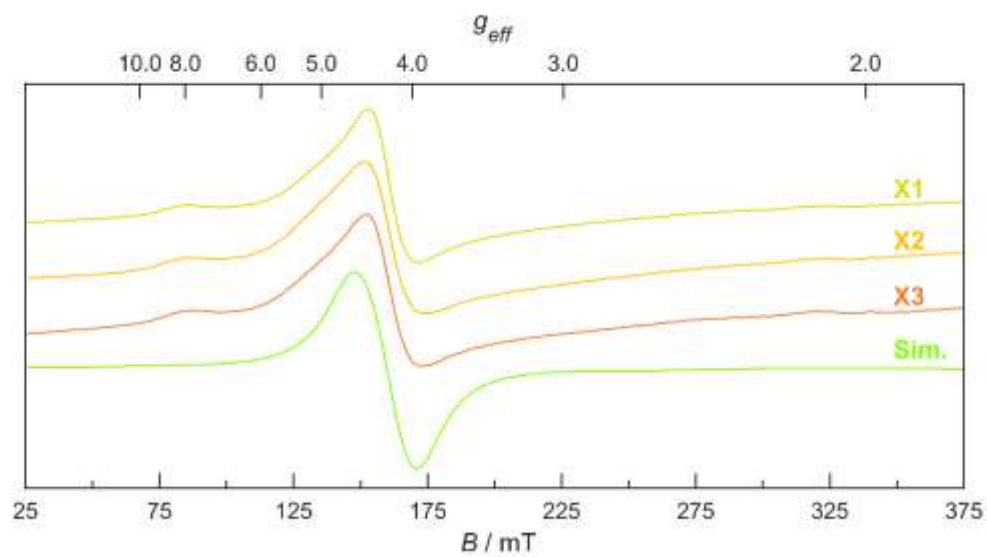

**Figure S28:** EPR spectra of **X1**, **X2** and **X3** in DMSO at 98 K. Simulation of a rhombic spin 5/2  $\text{Fe}^{3+}$  system showing the observed signature. Simulation parameters:  $g_x=g_y=g_z=2.0023$ ,  $D = 10\,000$  MHz,  $E/D = 0.28$ . Note: The intensity of the signal at  $g\sim 7.9$  is not accurately reproduced in the simulation due to line broadening effects.

### 3. Reactivity toward biological nucleophiles

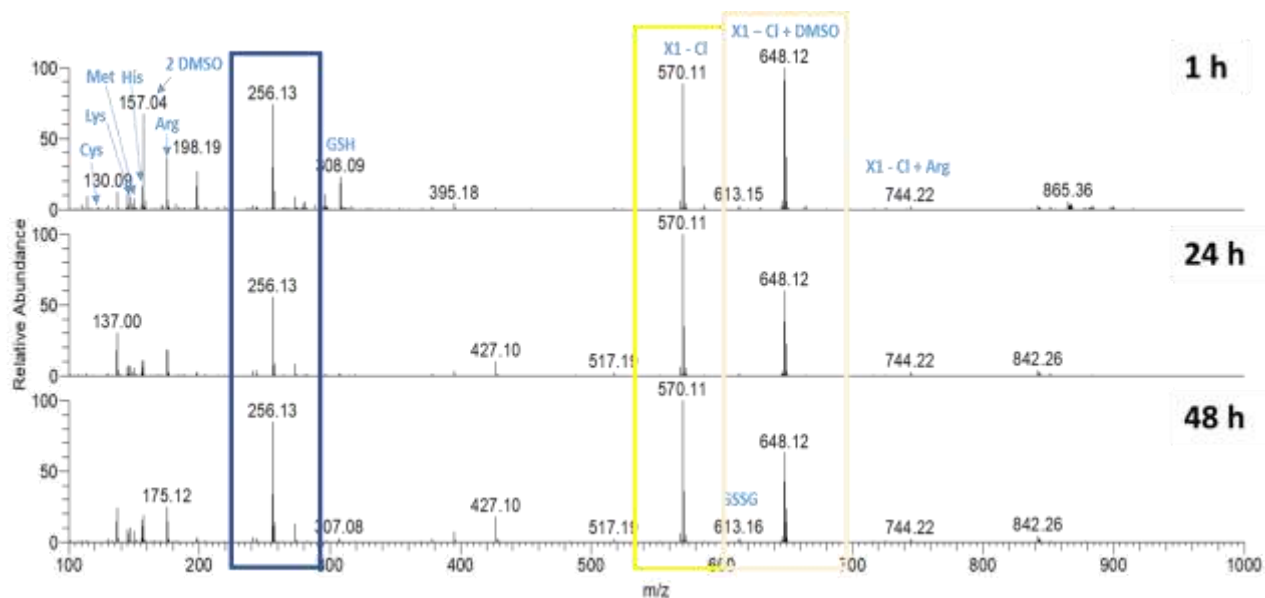

**Figure S29:** HR-MS spectra of X1 in an aqueous solution containing equimolar amounts of Arg, Cys, His, Lys, Met and GSH.

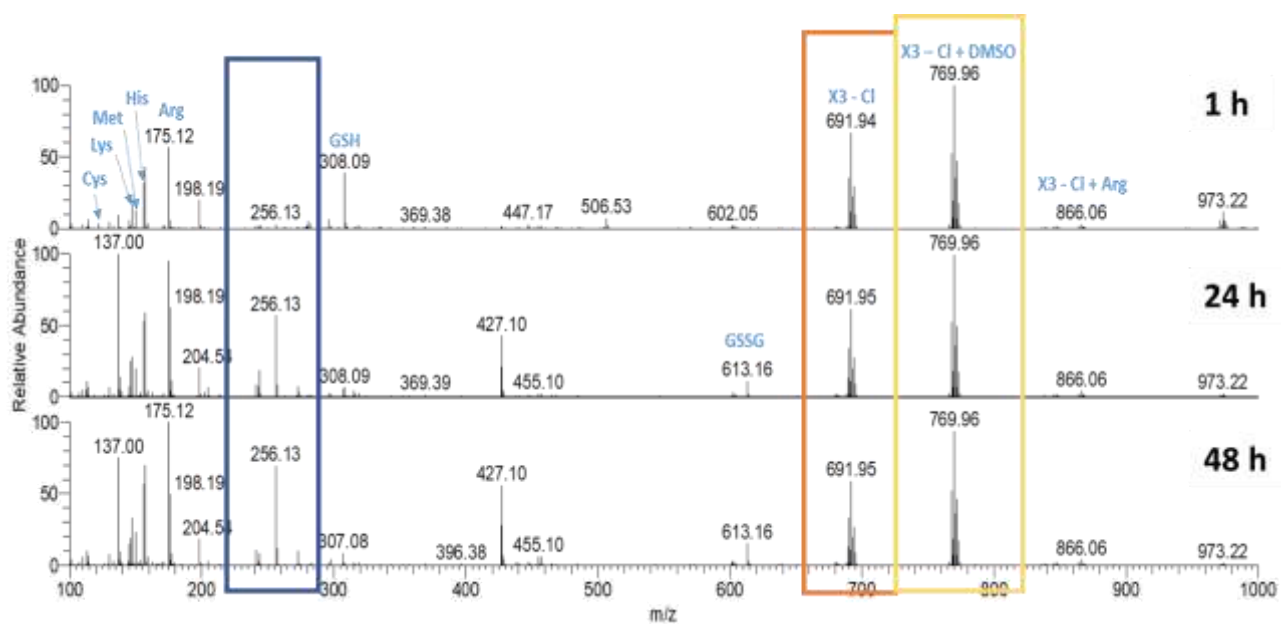

**Figure S30:** HR-MS spectra of X3 in an aqueous solution containing equimolar amounts of Arg, Cys, His, Lys, Met and GSH.

**Table S3:** List of ions observed in the HR-MS analysis of **X1** – **X3** in aqueous solution. Oleamide is a common contaminant.

|                            | species                                                                                 | m <sub>exp.</sub> | m <sub>calc</sub> | error [ppm] |
|----------------------------|-----------------------------------------------------------------------------------------|-------------------|-------------------|-------------|
| <b>biomolecules</b>        | [Cys + H] <sup>+</sup>                                                                  | 122.0272          | 122.0270          | 1.64        |
|                            | [Lys + H] <sup>+</sup>                                                                  | 147.1130          | 147.1128          | 1.36        |
|                            | [Met + H] <sup>+</sup>                                                                  | 150.0585          | 150.0583          | 1.33        |
|                            | [His + H] <sup>+</sup>                                                                  | 156.0769          | 156.0768          | 0.64        |
|                            | [Arg + H] <sup>+</sup>                                                                  | 175.1191          | 175.1190          | 0.57        |
|                            | [GSH + H] <sup>+</sup>                                                                  | 308.0914          | 308.0911          | 0.97        |
|                            | [GSSG + H] <sup>+</sup>                                                                 | 613.1604          | 613.1592          | 1.96        |
| <b>hydrolysis products</b> | [C <sub>16</sub> H <sub>17</sub> O <sub>2</sub> N + H] <sup>+</sup>                     | 256.1336          | 256.1332          | 1.56        |
|                            | [C <sub>16</sub> H <sub>20</sub> O <sub>2</sub> N <sub>2</sub> + H] <sup>+</sup>        | 273.1602          | 273.1598          | 1.46        |
|                            | [C <sub>23</sub> H <sub>20</sub> O <sub>3</sub> N <sub>1</sub> Cl + H] <sup>+</sup>     | 394.1212          | 394.1204          | 2.03        |
|                            | [C <sub>23</sub> H <sub>23</sub> O <sub>3</sub> N <sub>2</sub> Cl + H] <sup>+</sup>     | 411.1478          | 411.1470          | 1.95        |
| <b>X1</b>                  | [X1 - Fe - Cl + 3H] <sup>+</sup>                                                        | 517.1943          | 517.1933          | 1.93        |
|                            | [X1 - Cl] <sup>+</sup>                                                                  | 570.1057          | 570.1049          | 1.40        |
|                            | [X1 - Cl + DMSO] <sup>+</sup>                                                           | 648.1198          | 648.1190          | 1.23        |
|                            | [X1 - Cl + Lys] <sup>+</sup>                                                            | 716.2118          | 716.2104          | 1.95        |
|                            | [X1 - Cl + His] <sup>+</sup>                                                            | 725.1758          | 725.1741          | 2.34        |
|                            | [X1 - Cl + Arg] <sup>+</sup>                                                            | 744.2180          | 744.2167          | 1.75        |
|                            | [X1 - Cl + C <sub>16</sub> H <sub>20</sub> O <sub>2</sub> N <sub>2</sub> ] <sup>+</sup> | 842.2592          | 842.2573          | 2.26        |
|                            | [X1 - Cl + GSH] <sup>+</sup>                                                            | 877.1903          | 877.1888          | 1.71        |
| <b>X2</b>                  | [X2 - Cl] <sup>+</sup>                                                                  | 602.0470          | 602.0457          | 2.16        |
|                            | [X2 - Cl + DMSO] <sup>+</sup>                                                           | 680.0611          | 680.0596          | 2.21        |
|                            | [X2 - Cl + Lys] <sup>+</sup>                                                            | 748.1531          | 748.1512          | 2.54        |
|                            | [X2 - Cl + His] <sup>+</sup>                                                            | 757.1170          | 757.1152          | 2.38        |
|                            | [X2 - Cl + Arg] <sup>+</sup>                                                            | 776.1594          | 776.1574          | 2.58        |
|                            | [X2 - Cl + oleamide] <sup>+</sup>                                                       | 883.3197          | 883.3174          | 2.60        |
|                            | [X2 - Cl + GSH] <sup>+</sup>                                                            | 909.1316          | 909.1295          | 2.31        |
| <b>X3</b>                  | [X3 - Cl] <sup>+</sup>                                                                  | 691.9440          | 691.9426          | 2.02        |
|                            | [X3 - Cl + DMSO] <sup>+</sup>                                                           | 769.9585          | 769.9566          | 2.47        |
|                            | [X3 - Cl + Lys] <sup>+</sup>                                                            | 838.0500          | 838.0482          | 2.15        |
|                            | [X3 - Cl + His] <sup>+</sup>                                                            | 847.0140          | 847.0121          | 2.24        |
|                            | [X3 - Cl + Arg] <sup>+</sup>                                                            | 866.0563          | 866.0543          | 2.31        |
|                            | [X3 - Cl + oleamide] <sup>+</sup>                                                       | 973.2168          | 973.2145          | 2.36        |
|                            | [X3 - Cl + GSH] <sup>+</sup>                                                            | 999.0286          | 999.0264          | 2.20        |

#### 4. Biological activity

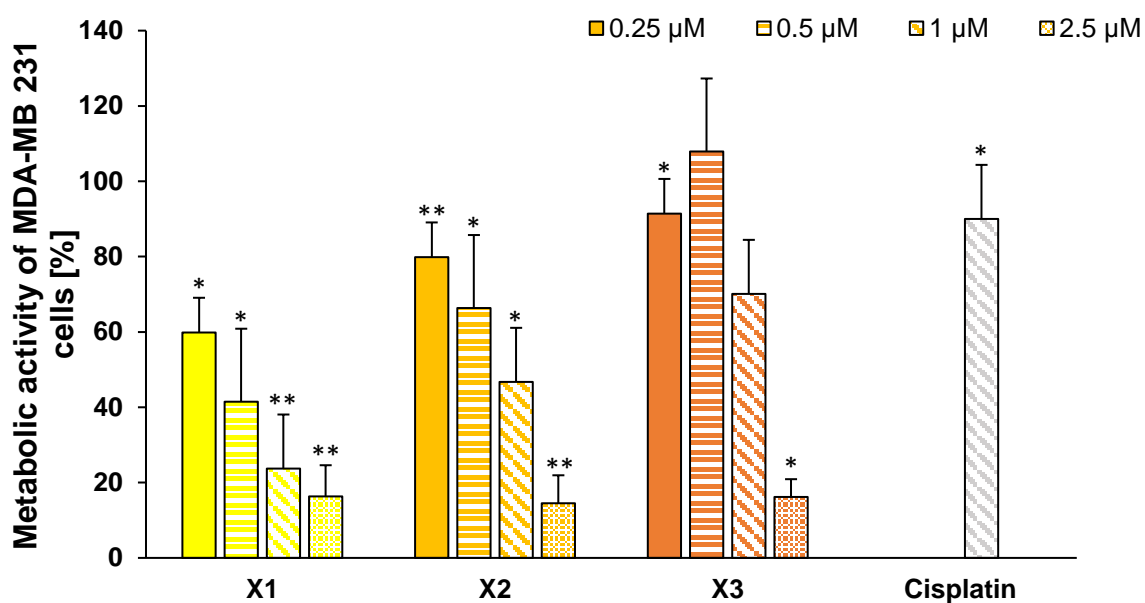

**Figure S31:** Effect of the iron(III) salen complexes **X1** – **X3** on the metabolic activity of MDA-MB 231. The mean proliferation + SE of eight independent experiments is plotted. The metabolic activity of cells only (without compound) was set at 100% (data not shown). The asterisks (\*  $p < 0.05$ , \*\*  $p < 0.005$  against no compound) represents statistical significance.



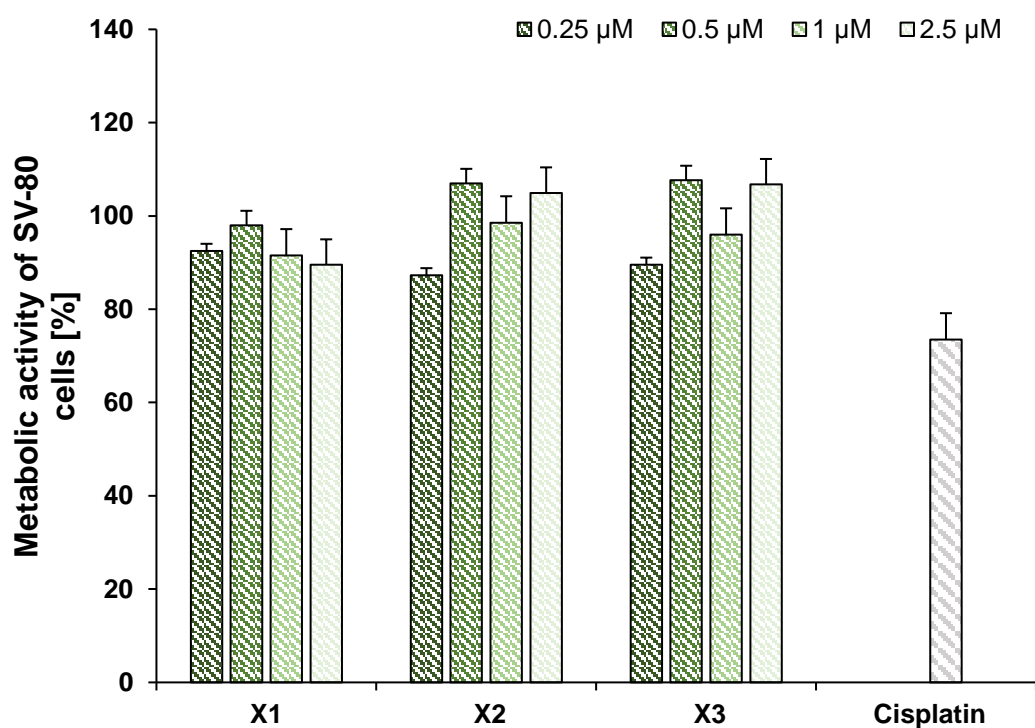

**Figure S32:** Effect of the iron(III) salene complexes **X1** – **X3** on the metabolic activity of SV-80 transformed fibroblasts. The mean metabolic activity + SE of five independent experiments is plotted. The metabolic activity of cells only (without compound) was set at 100%.

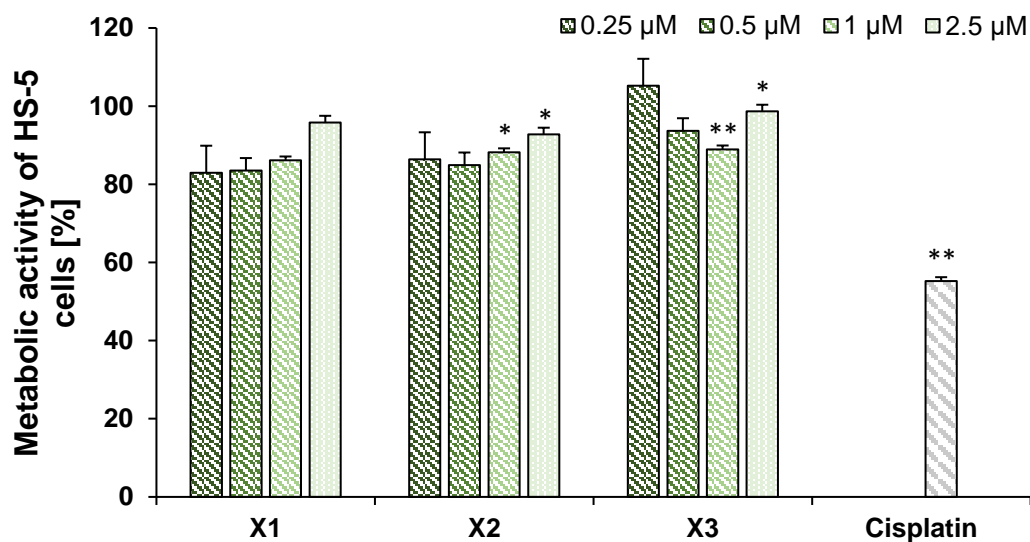

**Figure S33:** Effect of the iron(III) salene complexes **X1** – **X3** on the metabolic activity of HS-5 cells. The mean metabolic activity + SE of six independent experiments is plotted. The metabolic activity of cells only (without compound) was set at 100%. The asterisks (\*  $p < 0.05$ , \*\*  $p < 0.005$  against no compound) represents statistical significance.

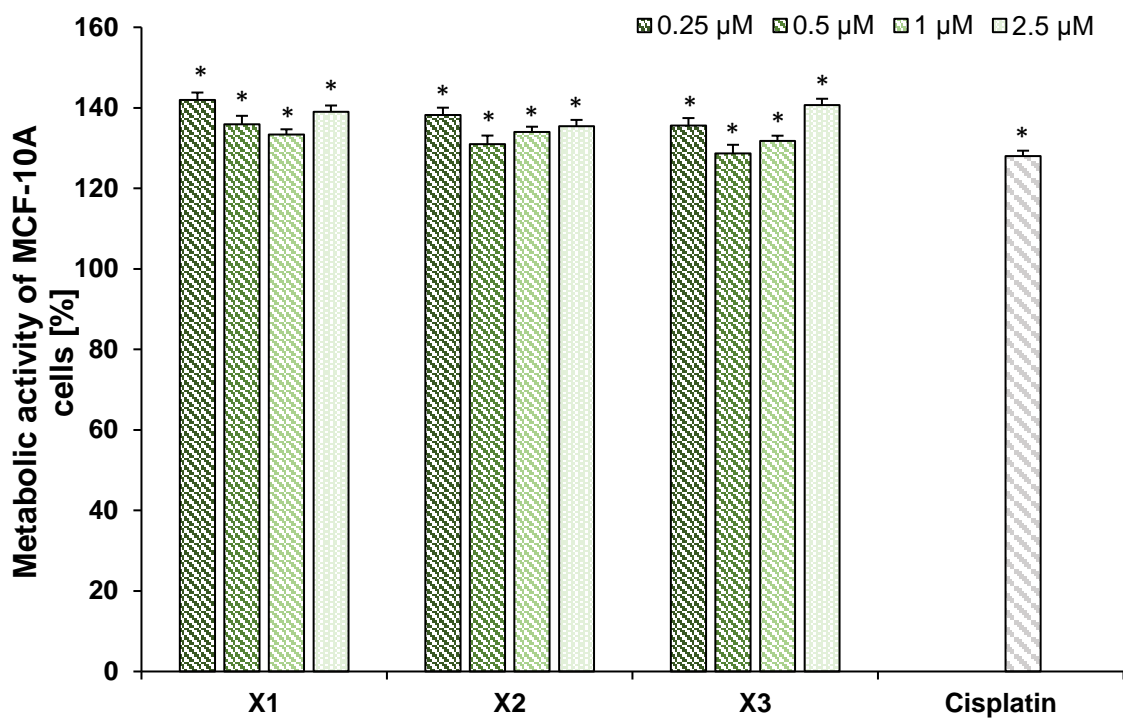

**Figure S34:** Effect of the iron(III) salene complexes **X1** – **X3** on the metabolic activity of MCF-10A cells. The mean metabolic activity + SE of six independent experiments is plotted. The metabolic activity of cells only (without compound) was set at 100%. The asterisks (\*  $p < 0.005$  against no compound) represent statistical significance.
